# Supplementary material for: Fluorescence imaging of hepatocellular carcinoma with a specific probe of COX-2
Source: Royal Society of Chemistry journal article supplement (doi:10.1039/c7ra07819f), 2018-01-01

Supplementary Figure 1. The molecular structure of the COX-2 -specific fluorogenic probe.

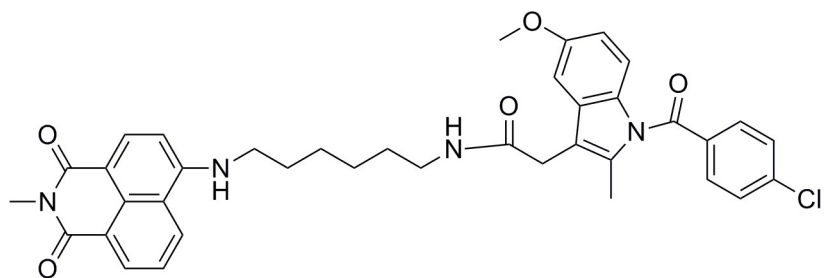

Supplementary Figure 2. Imaging tumors in vivo. COX-2 FP (30  $\mu$ M) was injected intravenously (30  $\mu$ L). The incubation time was 30 min.

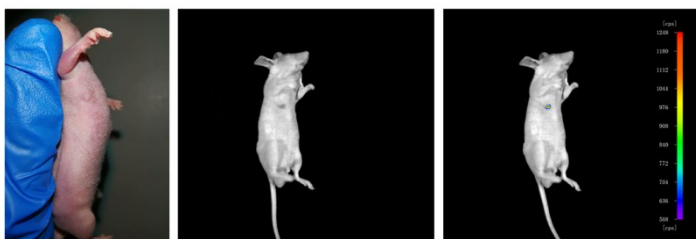

Supplement: c7ra07819f1.pdf [file c7ra07819f1.pdf]
